# Supplementary material
Source: PubMed Central journal article supplement (PMC9403846)
Supplement: jamadermatol-e223083-s001.pdf [file jamadermatol-e223083-s001.pdf]

## Supplementary Online Content

Trinh P, Li S, Sarin KY. Neurofibromatosis type 1 and risk of skin cancer. *JAMA Dermatol*. Published online August 24, 2022. doi:10.1001/jamadermatol.2022.3083

**eTable 1.** International Classification of Diseases, Ninth Revision (ICD-9) or Tenth Revision (ICD-10) Codes for Skin Cancers

**eTable 2.** International Classification of Diseases, Ninth Revision (ICD-9) or Tenth Revision (ICD-10) Codes for Malignant Peripheral Nerve Sheath Tumor and Optic Glioma

This supplementary material has been provided by the authors to give readers additional information about their work.

**eTable 1.** International Classification of Diseases, Ninth Revision (ICD-9) or Tenth Revision (ICD-10) Codes for Skin Cancers

| <b>Disease</b>          | <b>ICD-9</b> | <b>ICD-10</b>  |
|-------------------------|--------------|----------------|
| Basal Cell Carcinoma    | 173.*1       | C44.*1*        |
| Squamous Cell Carcinoma | 173.*2       | C44.*2*        |
| Melanoma                | 172.*        | C43.*<br>D03.* |

\* All values

**eTable 2.** International Classification of Diseases, Ninth Revision (ICD-9) or Tenth Revision (ICD-10) Codes for Malignant Peripheral Nerve Sheath Tumor and Optic Glioma

| <b>Disease</b>                          | <b>ICD-9</b> | <b>ICD-10</b> |
|-----------------------------------------|--------------|---------------|
| Malignant peripheral nerve sheath tumor | 171.*        | C47.*         |
| Optic glioma                            | 192.0        | C72.3*        |

\* All values
